# Supplementary material for: Systolic blood pressure variability in late-life predicts cognitive trajectory and risk of Alzheimer’s disease
Source: Frontiers journal article supplement (doi:10.3389/fnagi.2024.1448034), 2024-10-03
Supplement: Data_Sheet_1.pdf [file Data_Sheet_1.pdf]

| TITLE                                                                                                   | Page |
|---------------------------------------------------------------------------------------------------------|------|
| Supplementary Table S1: Characteristics of participants according to SBP trajectory.                    | 2    |
| Supplementary Table S2: Characteristics of participants according to AD diagnosis at T <sub>3</sub> .   | 3    |
| Supplementary Table S3: Characteristics of participants according to SBPV quartiles at T <sub>3</sub> . | 4    |

| Supplementary Table S1: Characteristics of participants according to SBP trajectory. |                          |                           |                              |
|--------------------------------------------------------------------------------------|--------------------------|---------------------------|------------------------------|
| Characteristics <sup>a</sup>                                                         | Incident AD <sup>b</sup> | Non-demented <sup>c</sup> | <i>P</i> -value <sup>*</sup> |
| N                                                                                    | 260                      | 167                       |                              |
| Age (years, median (IQR))                                                            | 75.00 (71.25-80.00)      | 74.00 (71.00-78.00)       | 0.080                        |
| Sex (female, %)                                                                      | 100 (38.46)              | 65 (38.92)                | 0.924                        |
| Education (years, median (IQR))                                                      | 16.00 (14.00-18.00)      | 16.00 (14.00-18.00)       | 0.279                        |
| <i>APOE</i> ε4 (yes, %)                                                              | 166 (63.85)              | 46 (27.54)                | <b>&lt;0.001</b>             |
| Clinical diagnosis (MCI, %)                                                          | 240 (92.31)              | 68 (40.72)                | <b>&lt;0.001</b>             |
| SBP (mmHg, mean ± SD)                                                                | 135.50 ± 17.14           | 131.80 ± 15.49            | <b>0.026</b>                 |
| DBP (mmHg, median (IQR))                                                             | 72.5 (67.00-80.00)       | 73.00 (67.00-80.00)       | 0.691                        |
| PP (mmHg, mean ± SD)                                                                 | 62.68 ± 14.41            | 58.44 ± 14.10             | <b>0.003</b>                 |

Values are mean ± standard deviation (SD), median (IQR (interquartile range)), or n (% of the group).

\*Chi-square tests (for categorical variables), Mann-Whitney test (for non-normally distributed continuous variables), and t-test (for normally distributed continuous variables) were used to compare characteristics.

a, characteristics of participants are based on the records at T<sub>0</sub>

b, participants who developed AD during the 8-year follow-up

c, participants who still remained non-demented at the end (T<sub>4</sub>) of 8-year follow-up

Abbreviations: AD, Alzheimer's disease; IQR, interquartile range; SD, standard deviation; *APOE*, apolipoprotein E gene; MMSE, Minimum Mental State Examination; SBP, systolic blood pressure; DBP, diastolic blood pressure; PP, pulse pressure

Supplementary Table S2: Characteristics of participants according to AD diagnosis at T<sub>3</sub>.

| Characteristics <sup>a</sup>    | All participants <sup>b</sup> | AD participants <sup>c</sup> | Controls               | P-value*         |
|---------------------------------|-------------------------------|------------------------------|------------------------|------------------|
| N                               | 829                           | 86                           | 743                    |                  |
| Age (years, median (IQR))       | 77.00 (73.00-81.00)           | 77.50 (73.00-81.25)          | 77.00 (73.00-81.00)    | 0.644            |
| Sex (female, %)                 | 347 (41.86)                   | 32 (37.21)                   | 315 (42.40)            | 0.356            |
| Education (years, median (IQR)) | 16.00 (14.00-18.00)           | 16.00 (14.00-18.00)          | 16.00 (14.00-18.00)    | 0.929            |
| <i>APOE</i> ε4 (yes, %)         | 314 (37.88)                   | 60 (69.77)                   | 254 (34.19)            | <b>&lt;0.001</b> |
| SBP (mmHg, median (IQR))        | 133.00 (122.00-144.00)        | 134.00 (120.80-149.00)       | 133.00 (123.00-144.00) | 0.821            |
| DBP (mmHg, median (IQR))        | 72.00 (66.00-80.00)           | 73.00 (67.00-80.00)          | 72.00 (66.00-80.00)    | 0.709            |
| PP (mmHg, median (IQR))         | 60.00 (50.00-70.00)           | 59.50 (49.50-70.75)          | 60.00 (50.00-70.00)    | 0.930            |
| SBPV Q1 <sup>d</sup> (n, %)     | 211 (25.45)                   | 14 (16.28)                   | 197 (26.51)            | <b>0.039</b>     |
| SBPV Q2 <sup>d</sup> (n, %)     | 206 (24.85)                   | 19 (22.09)                   | 187 (25.17)            | 0.532            |
| SBPV Q3 <sup>d</sup> (n, %)     | 205 (24.73)                   | 24 (27.91)                   | 181 (24.36)            | 0.471            |
| SBPV Q4 <sup>d</sup> (n, %)     | 207 (24.97)                   | 29 (33.72)                   | 178 (23.96)            | <b>0.048</b>     |

Values are mean ± standard deviation (SD), median (IQR (interquartile range)), or n (% of the group).

\*Chi-square tests (for categorical variables) and Mann-Whitney test (for non-normally distributed continuous variables) were used to compare characteristics.

a, characteristics of participants are based on the records at T<sub>3</sub>

b, participants for case-control study

c, participants who were new onset AD at T<sub>3</sub>

d, SBPV was defined as the within-individual SD of four SBP measurements (T<sub>0</sub>, T<sub>1</sub>, T<sub>2</sub>, and T<sub>3</sub>) and divided into four quartiles (Q1, Q2, Q3, and Q4).

Abbreviations: AD, Alzheimer's disease; SD, standard deviation; IQR, interquartile range; *APOE*, apolipoprotein E gene; MMSE, Minimum Mental State Examination; SBP, systolic blood pressure; DBP, diastolic blood pressure; PP, pulse pressure; SBPV, systolic blood pressure variability; Q1, quartile 1; Q2, quartile 2; Q3, quartile 3; Q4, quartile 4.

| Supplementary Table S3: Characteristics of participants according to SBPV quartiles at T <sub>3</sub> . |                               |                     |                     |                     |                     |                      |
|---------------------------------------------------------------------------------------------------------|-------------------------------|---------------------|---------------------|---------------------|---------------------|----------------------|
| Characteristics <sup>a</sup>                                                                            | All participants <sup>b</sup> | Q1 <sup>c</sup>     | Q2 <sup>c</sup>     | Q3 <sup>c</sup>     | Q4 <sup>c</sup>     | P-value <sup>*</sup> |
| N                                                                                                       | 658                           | 167                 | 162                 | 164                 | 165                 |                      |
| Age (years, median (IQR))                                                                               | 76.00 (73.00-81.00)           | 75.00 (72.00-80.00) | 76.00 (73.00-80.25) | 76.00 (73.00-81.00) | 78.00 (73.00-82.00) | <b>0.029</b>         |
| Sex (female, %)                                                                                         | 285 (43.31)                   | 69 (41.32)          | 73 (45.06)          | 70 (42.68)          | 73 (44.24)          | 0.906                |
| Education (years, median (IQR))                                                                         | 16.00 (14.00-18.00)           | 16.00 (14.00-18.00) | 16.00 (14.00-18.00) | 16.00 (14.25-18.00) | 16.00 (14.00-18.00) | 0.529                |
| <i>APOE</i> ε4 (yes, %)                                                                                 | 222 (33.74)                   | 56 (33.53)          | 52 (32.10)          | 56 (34.15)          | 58 (35.15)          | 0.949                |
| Clinical diagnosis (MCI, %)                                                                             | 110 (16.72)                   | 28 (16.77)          | 29 (17.90)          | 27 (16.46)          | 26 (15.76)          | 0.964                |
| SBP (mmHg, mean ± SD)                                                                                   | 133.80 ± 16.42                | 130.50 ± 13.09      | 132.90 ± 14.29      | 132.60 ± 14.60      | 139.20 ± 21.25      | <b>&lt;0.001</b>     |
| DBP (mmHg, median (IQR))                                                                                | 72.00 (66.00-80.00)           | 70.00 (66.00-78.00) | 73.00 (66.00-80.00) | 72.00 (65.00-80.00) | 74.00 (67.00-82.00) | 0.070                |
| PP (mmHg, mean ± SD)                                                                                    | 60.72 ± 14.77                 | 58.47 ± 13.11       | 59.38 ± 13.27       | 60.39 ± 12.40       | 64.64 ± 18.76       | <b>0.006</b>         |

Values are mean ± standard deviation (SD), median (IQR(interquartile range)), or n (% of the group).

\* Chi-square tests (for categorical variables), Kruskal-Wallis test (for non-normally distributed continuous variables), and one-way ANOVA (for normally distributed continuous variables) were used to compare characteristics.

a, characteristics of participants are based on the records at T<sub>3</sub>

b, participants for Cox proportional hazard model.

c, SBPV was calculated over T<sub>0</sub> to T<sub>3</sub> and divided into quartiles. Participants were divided into four groups according to SBPV quartiles.

Abbreviations: SBPV, systolic blood pressure variability; IQR, interquartile range; SD, standard deviation; *APOE*, apolipoprotein E gene; MCI, mild cognitive impairment; SBP, systolic blood pressure; DBP, diastolic blood pressure; PP, pulse pressure
